# Supplementary material for: Analysis of gut microbial regulation of host gene expression along the length of the gut and regulation of gut microbial ecology through MyD88
Source: PubMed Central journal article supplement — Gut. 2011 Nov 23;61(8):1124–31. doi: 10.1136/gutjnl-2011-301104 (PMC3388726; doi:10.1136/gutjnl-2011-301104), 2011-11-23
Supplement: gutjnl-2011-301104-s1.pdf [file gutjnl-2011-301104-s1.pdf]

## **Supplementary material to:**

**Analysis of gut microbial regulation of host gene expression along the length of the gut  
and regulation of gut microbial ecology through MyD88**

Erik Larsson, Valentina Tremaroli, Ying Shiuan Lee, Omry Koren, Intawat Nookaew,  
Ashwana Fricker, Jens Nielsen, Ruth E. Ley, Fredrik Bäckhed

Contents:

Figures S1-6

Tables S1,4,5

**Figure S1**

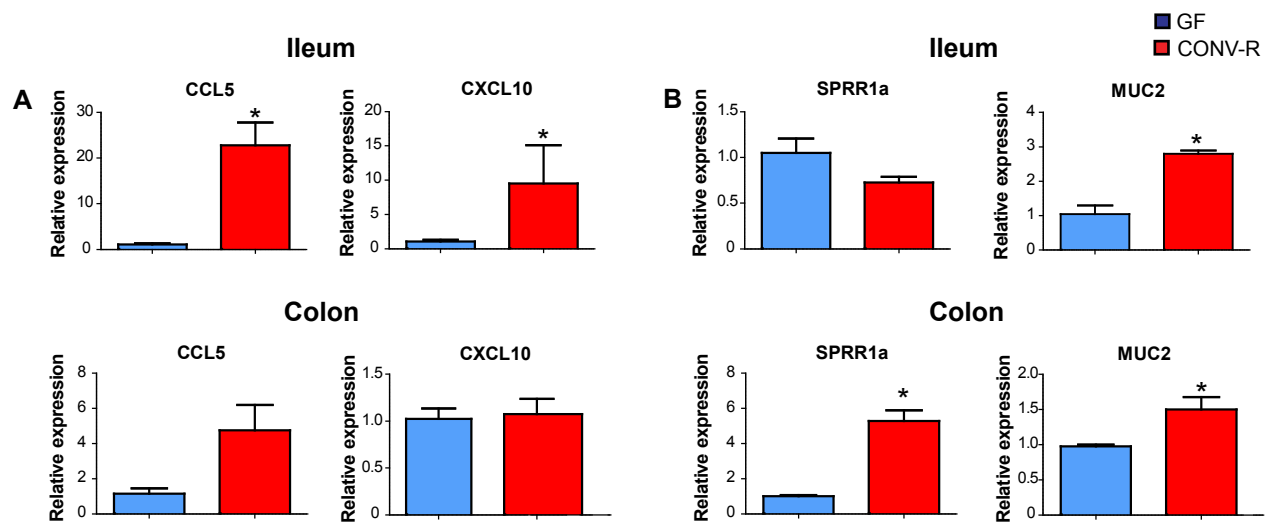

**Figure S1.** qRT-PCR analysis of (A) chemokines and (B) genes involved in mucosa fortification in epithelial cells isolated from the ileum and colon of GF and CONV-R mice. n = 4 mice/group. \* P < 0.05; Mann Whitney U-test.

**Figure S2**

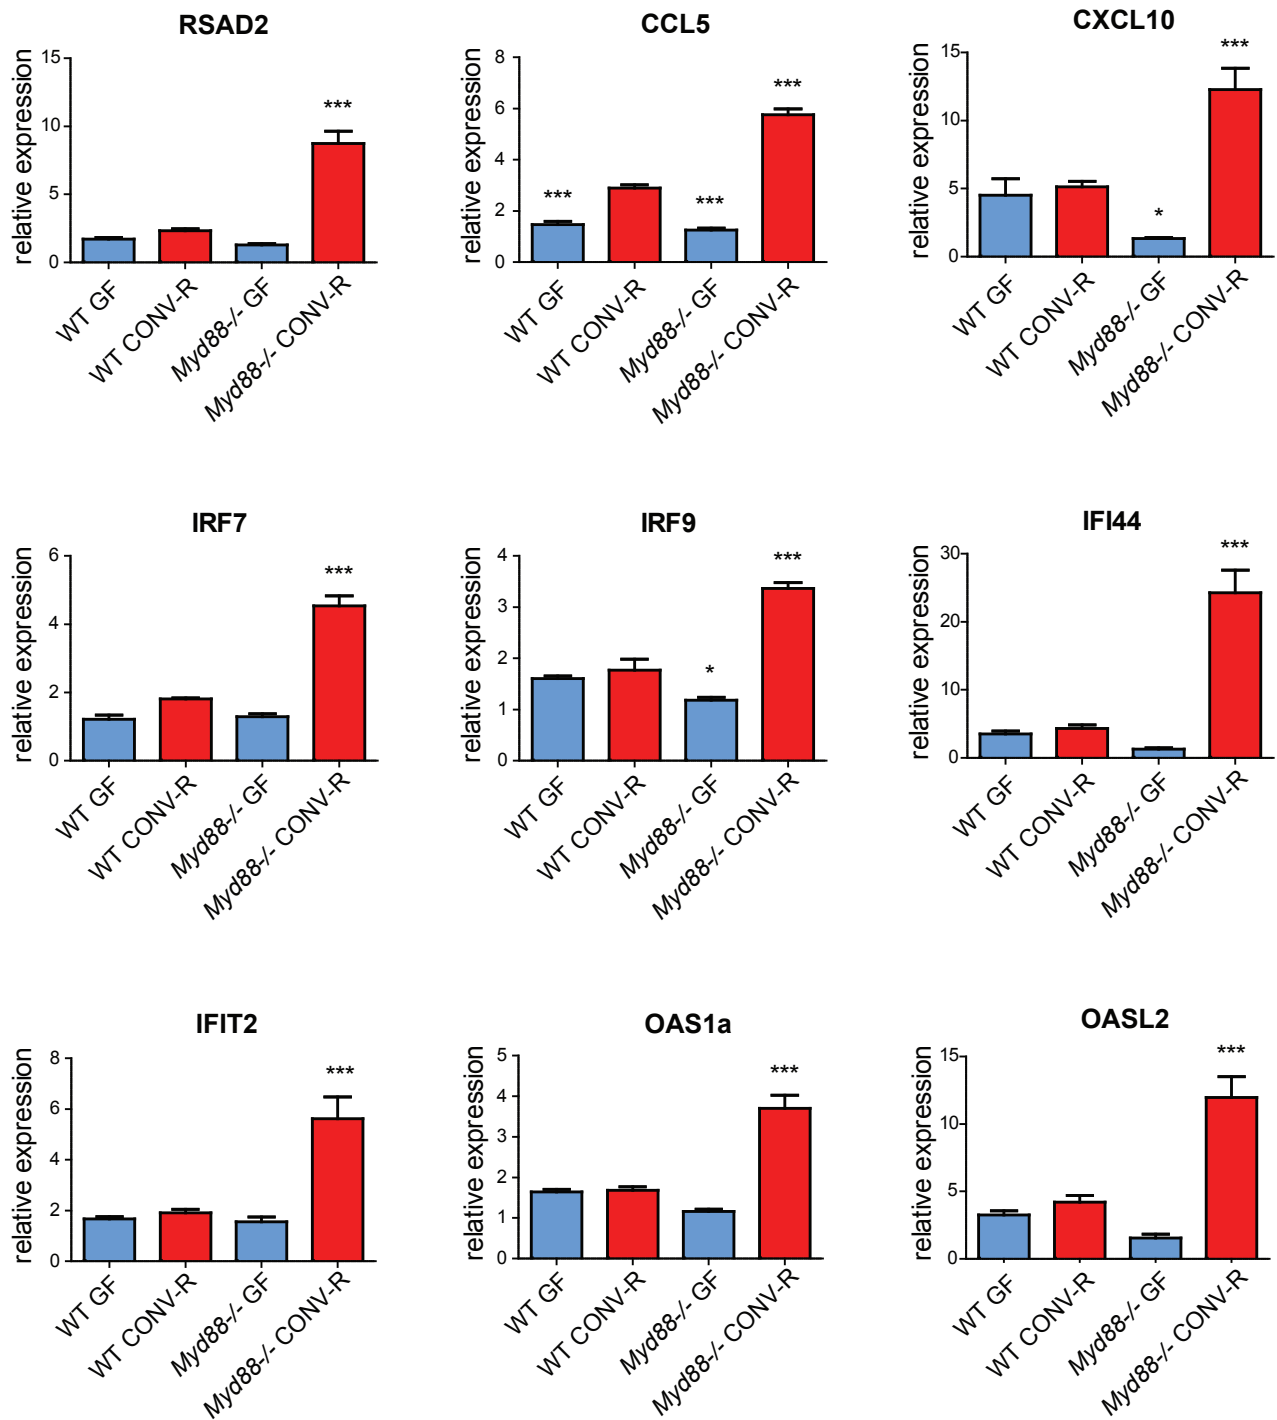

**Figure S2.** qRT-PCR validation of antiviral gene expression in the proximal colon of CONV-R wildtype and *Myd88*<sup>-/-</sup> mice. n = 4-6/group. \* P < 0.05; \*\*\* P < 0.0001; ANOVA.

**Figure S3**

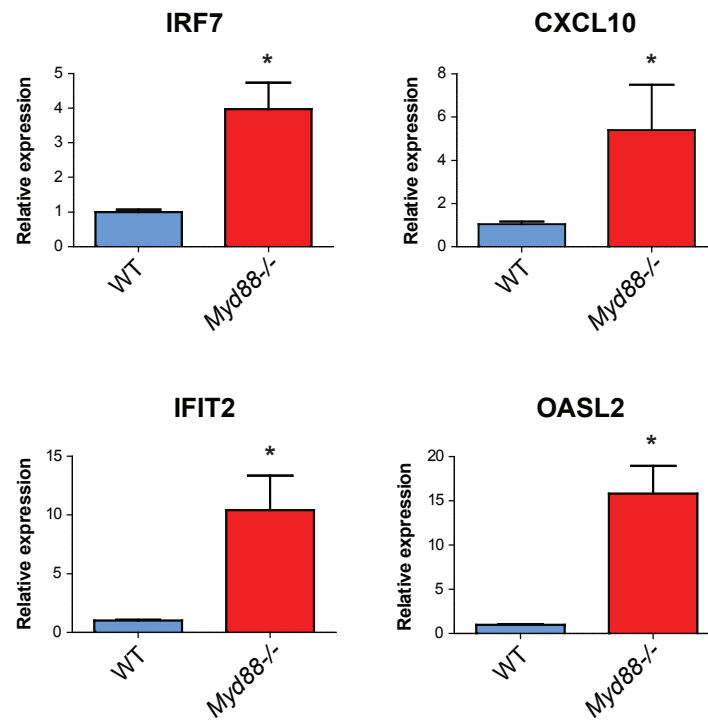

**Figure S3.** qPCR analysis of antiviral gene expression in epithelial cells isolated from the colon of CONV-R wildtype and Myd88<sup>-/-</sup> mice. n = 4/group. \* P < 0.05; Mann-Whitney U-test.

**Figure S4**

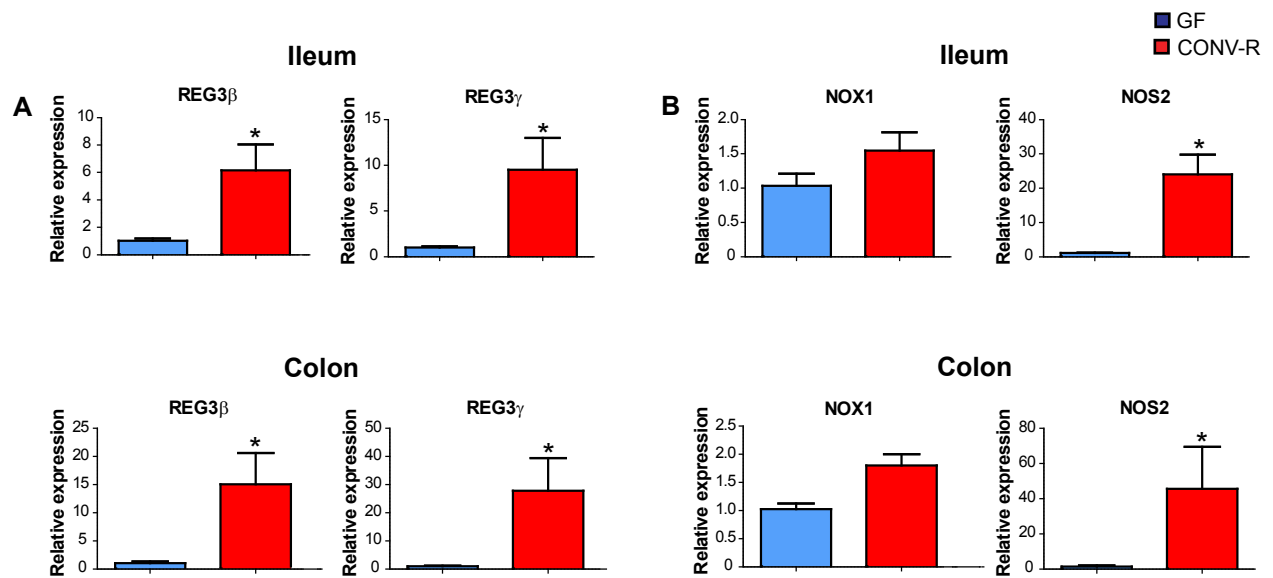

**Figure S4.** qRT-PCR analysis of antimicrobial genes in epithelial cells isolated from ileum and colon of GF and CONV-R mice. n = 4 mice/group. \* P < 0.05; Mann Whitney U-test.

**Figure S5**

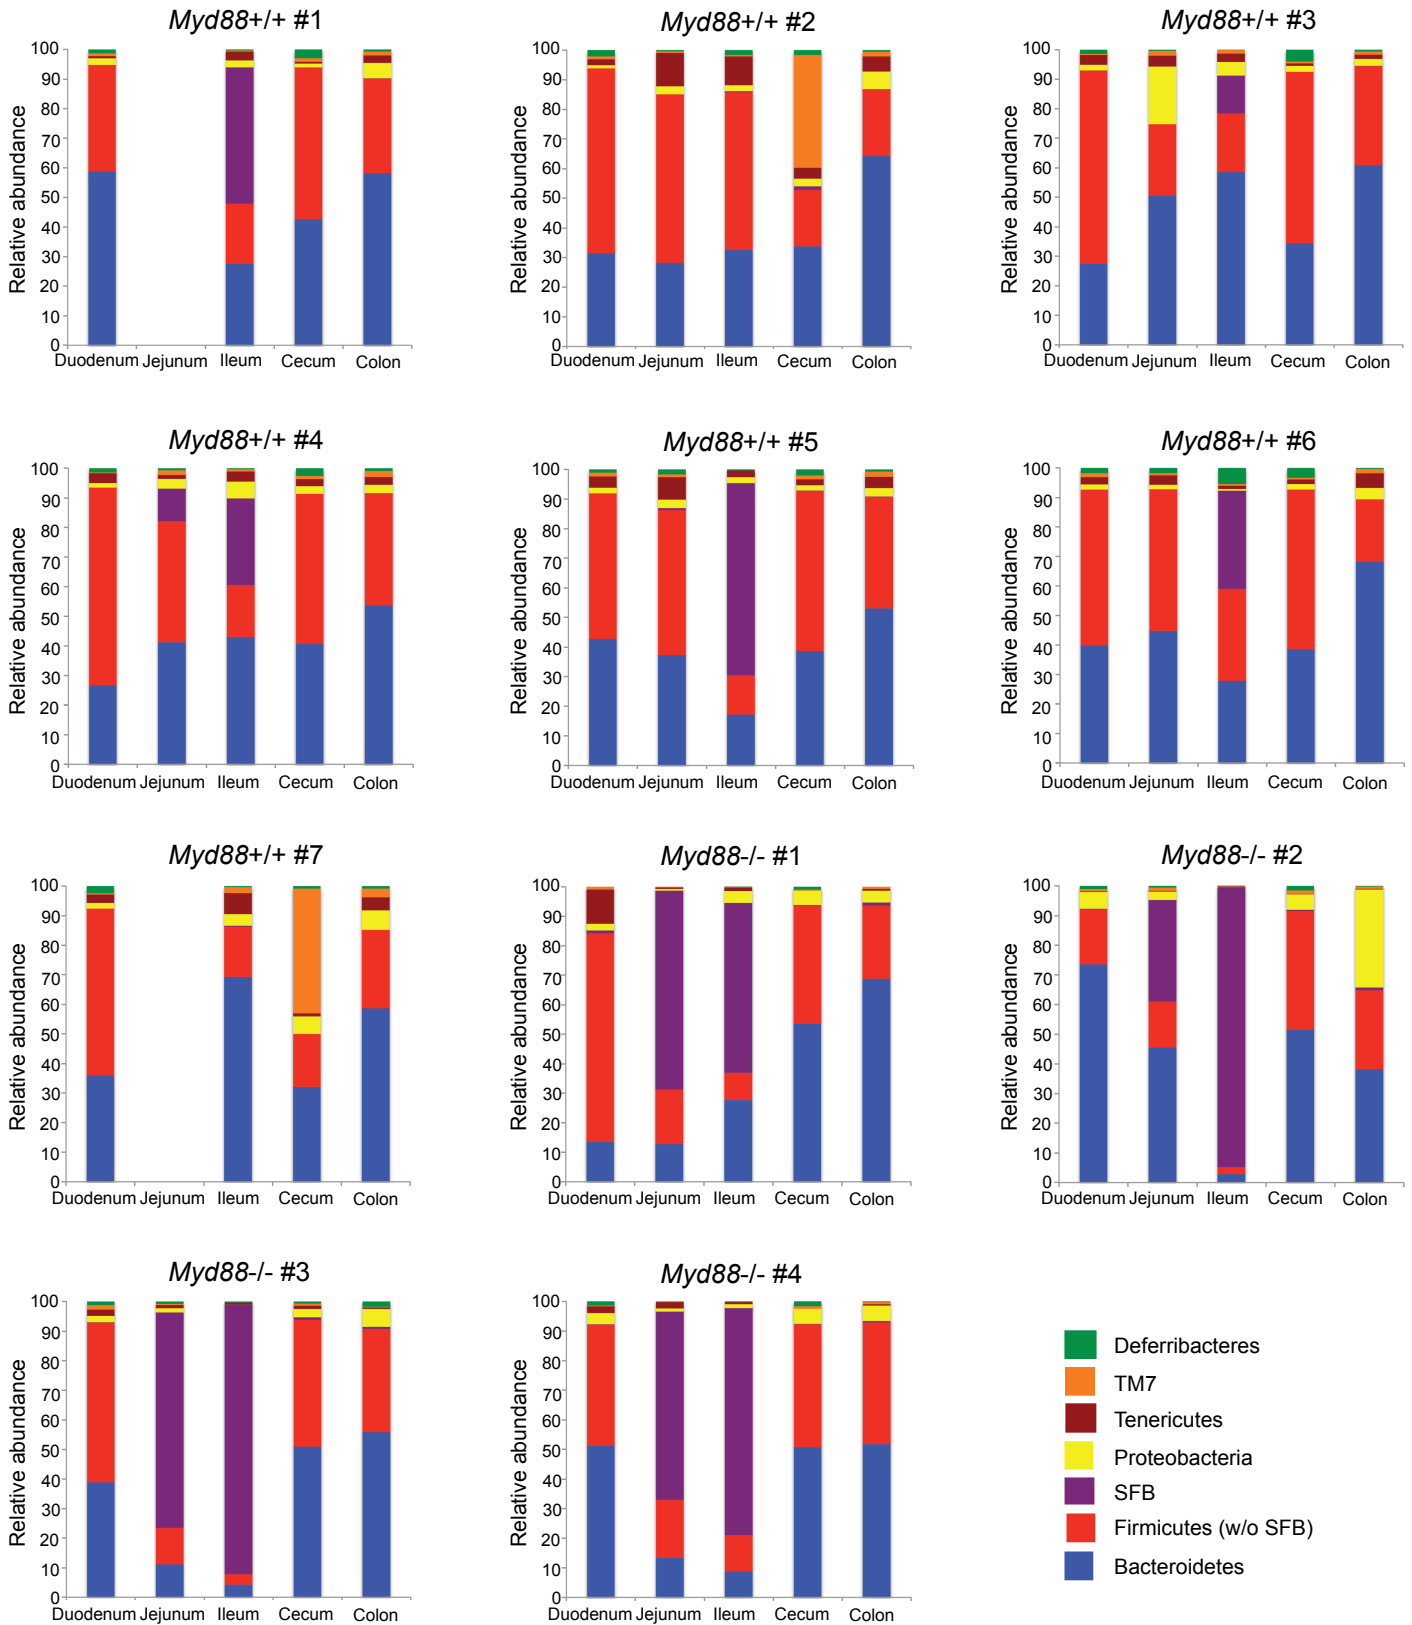

**Figure S5.** Relative abundance of the different phyla in individual mice (*Myd88* +/- or +/-) along the length of the gut.

**Figure S6**

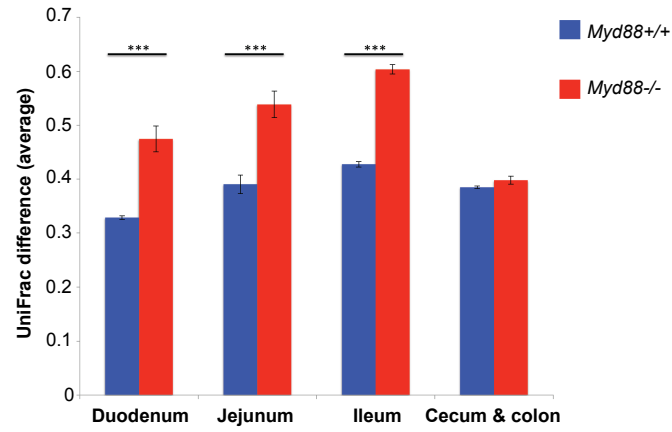

**Figure S6.** Mean unweighted UniFrac distances derived from the different sections of the gut. P-values were corrected for multiple comparisons using the Bonferroni correction; \*\*\*  $p < 0.0005$ .  $n = 4-7$  mice/group.

**Table S1. Primer sequences used for validation of DNA microarray data by qRT-PCR.**

| Gene          | Primer Sequence (5'-3')     | Reference                                   |
|---------------|-----------------------------|---------------------------------------------|
| Rsd2          | F TGCTGGCTGAGAATAGCATTAGG   | Primer bank <sup>1*</sup> (ID: 31543946a1)  |
|               | R GCTGAGTGCTGTTCCCATCT      |                                             |
| Irf7          | F GAGACTGGCTATTGGGGGAG      | Primer bank <sup>1*</sup> (ID: 8567364a1)   |
|               | R GACCGAAATGCTTCCAGGG       |                                             |
| Cxcl10        | F CCAAGTGCTGCCGTCATTTTC     | Primer bank <sup>1*</sup> (ID: 10946576a1)  |
|               | R GGCTCGCAGGGATGATTTCAA     |                                             |
| Ccl5          | F GCTGCTTTGCCTACCTCTCC      | Primer bank <sup>1*</sup> (ID: 7305461a1)   |
|               | R TCGAGTGACAAACACGACTGC     |                                             |
| Ifi44         | F AACTGACTGCTCGCAATAATGT    | Primer bank <sup>1*</sup> (ID: 19527086a1)  |
|               | R GTAACACAGCAATGCCTCTTGT    |                                             |
| Irf9          | F GCCGAGTGGTGGGTAAGAC       | Primer bank <sup>1*</sup> (ID: 6680474a1)   |
|               | R GCAAAGGCGCTGAACAAAGAG     |                                             |
| Ifit2         | F AGTACAACGAGTAAGGAGTCACT   | Primer bank <sup>1*</sup> (ID: 6680363a1)   |
|               | R AGGCCAGTATGTTGCACATGG     |                                             |
| Oas1a         | F ATGGAGCACGGACTCAGGA       | Primer bank <sup>1*</sup> (ID: 21630283a1)  |
|               | R TCACACACGACATTGACGGC      |                                             |
| Oasl2         | F AGGGGACAACCCTGAACCA       | Primer bank <sup>1*</sup> (ID: 16924024a1)  |
|               | R TAGGCCAGGCTTCTGCTACA      |                                             |
| Sprr1a        | F TTGTGCCCCCAAACCAAG        | Primer bank <sup>1*</sup> (ID: 6678115a1)   |
|               | R GGCTCTGGTGCCTTAGGTTG      |                                             |
| Muc2          | F CAAGGGCTCGGAACCTCCAG      | Primer bank <sup>1*</sup> (ID: 294610642b1) |
|               | R CCAGGGAATCGGTAGACATCG     |                                             |
| Reg3 $\beta$  | F TACTGCCTTAGACCGTGCTTTCTG  | Vaishnava (2008) PNAS 105:20858-20863       |
|               | R GACATAGGGCAACTTCACCTCACA  |                                             |
| Reg3 $\gamma$ | F TTCCTGTCCTCCATGATCAAAA    | Vaishnava (2008) PNAS 105:20858-20863       |
|               | R CATCCACCTCTGTTGGGTTCA     |                                             |
| Nos2          | F AGCCTTGCATCCTCATTGG       | Huang (2009) Mol Cell 35:48-57              |
|               | R CACTCTCTTGCGGACCATCT      |                                             |
| Nox1          | F CTGACAAGTACTATTACACGAGAG  | Ibi (2008) J Neurosci 28:9486-9494          |
|               | R CATATATGCCACCAGCTTATGGAAG |                                             |

<sup>1</sup> Spandidos (2010) Nucl Acids Res 38:D792-9.\* available at: <http://pga.mgh.harvard.edu/primerbank/index.html>



**Table S4. qRT-PCR validation of selected microbially regulated genes in whole tissues from C57BL/6 (one-way ANOVA)**

| <b>Ileum</b>         |                             |                         |                             |                         |                          |
|----------------------|-----------------------------|-------------------------|-----------------------------|-------------------------|--------------------------|
| Gene                 | <i>Myd88</i> <sup>+/+</sup> |                         | <i>Myd88</i> <sup>-/-</sup> |                         | <b>Confirmed results</b> |
| <i>Antibacterial</i> | GF                          | CONV-R                  | GF                          | CONV-R                  |                          |
| Nox1                 | 1.08±0.4                    | 3.5±1.2 <sup>**</sup>   | 1.3±0.3                     | 7.6±1.1 <sup>***</sup>  | Yes                      |
| Nos2                 | 1.0±0.1                     | 18.7±3.3 <sup>***</sup> | 1.1±0.3                     | 18.1±3.4 <sup>***</sup> | Yes                      |
| Duox2                | 1.0±0.08                    | 11.0±2.0 <sup>***</sup> | 1.2±0.05                    | 16.8±5.2 <sup>***</sup> | Yes                      |

Yes, qRT-PCR confirmed microarray data; No, qRT-PCR did not confirm microarray data.

**Table S5. qRT-PCR validation of selected microbially regulated genes in ileal tissue from Swiss Webster mice (one-way ANOVA)**

| Gene                                                               | Ileum   |           | Confirmed results<br>(GF vs CONVR) |
|--------------------------------------------------------------------|---------|-----------|------------------------------------|
|                                                                    | GF      | CONV-R    |                                    |
| <i>Chemokines,<br/>mucosa<br/>fortification,<br/>antibacterial</i> |         |           |                                    |
| Ccl5                                                               | 1.1±0.4 | 5.8±1.9*  | Yes                                |
| Cxcl10                                                             | 1.1±0.5 | 3.4±1.4*  | Yes                                |
| Sprr1a                                                             | 1.0±0.3 | 2.2±2.5   | Yes                                |
| Muc2                                                               | 1.0±0.2 | 1.5±0.1*  | No <sup>a</sup>                    |
| Muc4                                                               | 1.0±0.3 | 2.8±3.1   | No <sup>b</sup>                    |
| Muc13                                                              | 1.0±0.2 | 1.8±0.2*  | Yes                                |
| Reg3 $\gamma$                                                      | 1.0±0.2 | 2.5±0.6*  | Yes                                |
| Reg3 $\beta$                                                       | 1.0±0.3 | 3.2±0.6*  | Yes                                |
| Nox1                                                               | 1.4±1.6 | 39.7±72.3 | No <sup>b</sup>                    |
| Nos2                                                               | 1.0±0.4 | 9.2±4.9*  | Yes                                |
| Duox2                                                              | 1.0±0.1 | 2.2±0.9*  | Yes                                |

Yes, qRT-PCR confirmed microarray data; No, qRT-PCR did not confirm microarray data.

<sup>a</sup>Small difference in expression levels between GF and CONVR detected by microarray.

<sup>b</sup>High deviation in qRT-PCR data of CONVR mice.
